# Supplementary material
Source: PubMed Central journal article supplement (PMC9427932)
Supplement: 41467_2022_32455_MOESM2_ESM.pdf [file 41467_2022_32455_MOESM2_ESM.pdf]

## **Description of Additional Supplementary Files**

File Name: Supplementary Data 1

Description: Overview of the 731 strains (including 720 Russian clone/W148 strains) implemented for the whole-genome Bayesian inferences and phylogenetic reconstructions.

File Name: Supplementary Data 2

Description: List of the W148 specific SNP's under potential positive selection according to HOMOPLASYFINDER.

File Name: Supplementary Data 3

Description: Sampling rationale, geographic origin and estimated fractions of the studied samples.

File Name: Supplementary Data 4

Description: Resistance target genes and rationales for molecular drug resistance prediction.
